# Supplementary material
Source: ML conference proceedings conference paper supplement (https://openaccess.thecvf.com/content/ICCV2021/html/Zhi_MGSampler_An_Explainable_ICCV_2021_paper.html)
Supplement: Supplementary file 1 [file Zhi_MGSampler_An_Explainable_ICCV_2021_supplemental.pdf]

# MGSampler: An Explainable Sampling Strategy for Video Action Recognition

## \*\*Supplementary Material\*\*

Yuan Zhi Zhan Tong Limin Wang<sup>✉</sup> Gangshan Wu  
State Key Laboratory for Novel Software Technology, Nanjing University, China  
{yuanzhi, tongzhan}@smail.nju.edu.cn, {lmwang, gswu}@nju.edu.cn

### A. Evaluation on multiple views

The goal of MGSampler is to provide a holistic sparse sampler and only sample one clip from each video for efficient inference. That is a widely used testing scheme by recent methods in Sth-Sth dataset [3]. Indeed, multi-view testing could further improve the performance but also increase computational cost. We perform multi-view testing (2 clips and 3 crops) on our MGSampler in the same manner with TSM[6], and the result is shown in Table 1.

| Model   | Frames | Test-Views | Sampler   | Top-1 Acc  |
|---------|--------|------------|-----------|------------|
| TSM-R50 | 8      | 1×1        | TSN       | 57.9       |
| TSM-R50 | 8      | 1×1        | <b>MG</b> | 59.8(+1.9) |
| TSM-R50 | 8      | 2×3        | TSN       | 61.2       |
| TSM-R50 | 8      | 2×3        | <b>MG</b> | 62.9(+1.7) |

Table 1. Multi-view testing on **Something-Something V2**.

### B. Use MGSampler as a clip sampler

Our MGSampler could be easily adapted to dense clip sampling. The original dense methods samples 8 frames from continuous 32 frames with stride 4. Our MGSampler can adaptively sample a 8-frame clip guided by accumulation curve from the same continuous 32 frames. The results on Sth-Sth V2 are shown in Table 2, which demonstrates the effectiveness of MGSampler on dense sampling.

| Model        | Frames | Test-Views | Clip Sampler | Top-1 Acc  |
|--------------|--------|------------|--------------|------------|
| SlowOnly-R50 | 8      | 1×1        | fixed stride | 57.7       |
| SlowOnly-R50 | 8      | 1×1        | <b>MG</b>    | 58.5(+0.8) |
| SlowOnly-R50 | 8      | 10×3       | fixed stride | 62.1       |
| SlowOnly-R50 | 8      | 10×3       | <b>MG</b>    | 62.5(+0.4) |

Table 2. MGSampler extension as a dense clip sampler. Testing with SlowOnly-R50 [2] on **Something-Something V2**.

### C. Results on untrimmed videos

we extend MGSampler to untrimmed video testing. The results in ActivityNet [1] is reported in Table 3. We first

✉: Corresponding author.

perform sparse frame sampling in a TSN-like framework, and our MGSampler is better than TSN by 1.4%. Then we use MGSampler to perform dense clip sampling as in Section B and it is better than standard dense clip sampling by 0.7%.

| Model        | Frames | Test-Views | Sampler         | Top-1 Acc  |
|--------------|--------|------------|-----------------|------------|
| SlowOnly-R50 | 8      | 1×1        | TSN             | 77.4       |
| SlowOnly-R50 | 8      | 1×1        | <b>MG</b>       | 78.8(+1.4) |
| SlowOnly-R50 | 8      | 10×3       | 8×8 clip        | 80.3       |
| SlowOnly-R50 | 8      | 10×3       | <b>MG(clip)</b> | 81.0(+0.7) |

Table 3. Performance comparison on **ActivityNet 1.3**.

### D. Visualization analysis

More examples of comparison between uniform sample and motion-guided sample on Sth-Sth [3], Diving48 [5], UCF101 [8], HMDB [4], Jester [7] datasets. The left column of Figure 1 is the cumulative distribution motion and the right column is the sampled frames.

### References

- [1] Fabian Caba Heilbron, Victor Escorcia, Bernard Ghanem, and Juan Carlos Niebles. Activitynet: A large-scale video benchmark for human activity understanding. In *Proceedings of the IEEE conference on computer vision and pattern recognition*, pages 961–970, 2015.
- [2] Christoph Feichtenhofer, Haoqi Fan, Jitendra Malik, and Kaiming He. Slowfast networks for video recognition. In *Proceedings of the IEEE/CVF international conference on computer vision*, pages 6202–6211, 2019.
- [3] Raghav Goyal, Samira Ebrahimi Kahou, Vincent Michalski, Joanna Materzynska, Susanne Westphal, Heuna Kim, Valentin Haenel, Ingo Fruend, Peter Yianilos, Moritz Mueller-Freitag, et al. The “Something Something” Video Database for Learning and Evaluating Visual Common Sense. In *ICCV*, 2017.
- [4] Hildegard Kuehne, Hueihan Jhuang, Estíbaliz Garrote, Tomaso Poggio, and Thomas Serre. HMDB: A Large Video Database for Human Motion Recognition. In *ICCV*, 2011.
- [5] Yingwei Li, Yi Li, and Nuno Vasconcelos. Resound: Towards action recognition without representation bias. In *ECCV*, pages 513–528, 2018.

## Something-Something

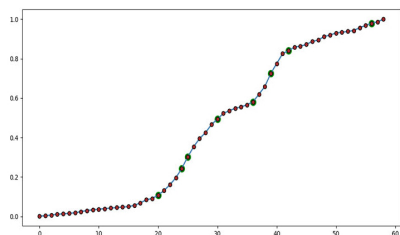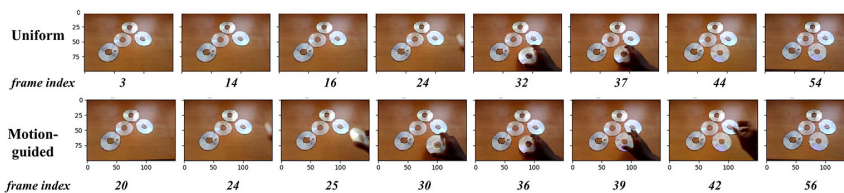

label: putting something similar to other things that are already on the table

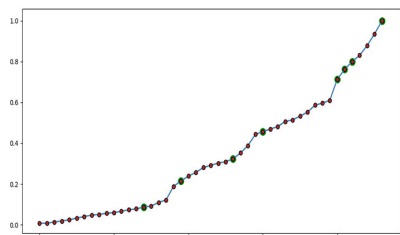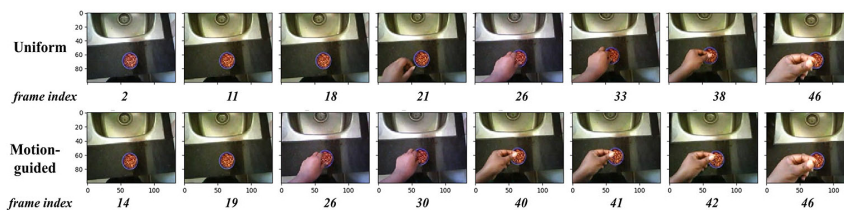

label: taking something out of something

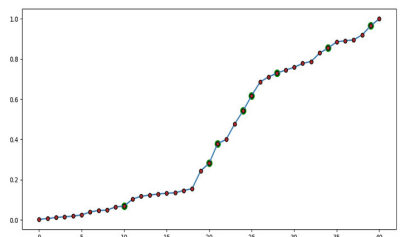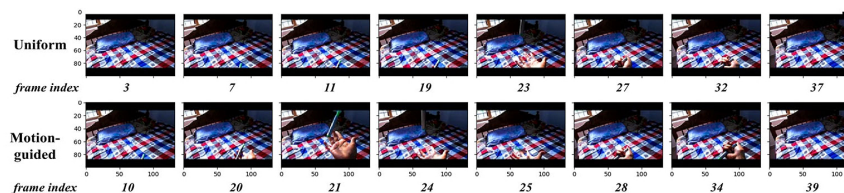

label: throwing something in the air and catch it

## Diving48

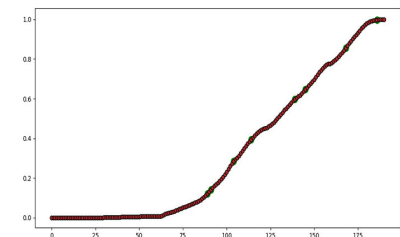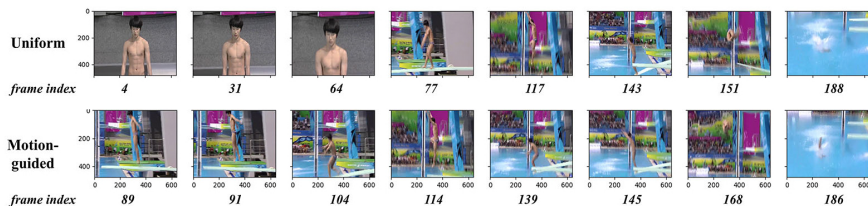

label: ["Forward", "35som", "NoTwis", "PIKE"]

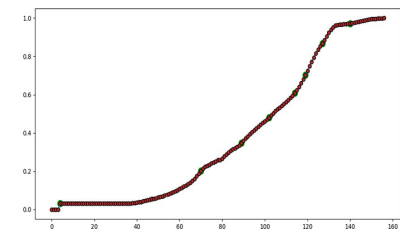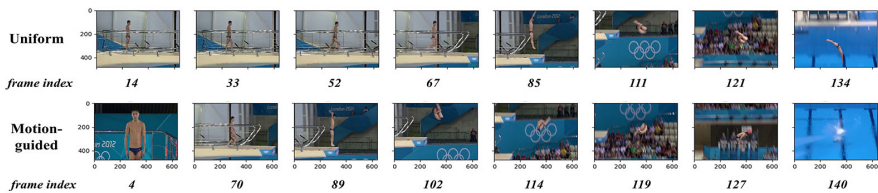

label: ["Forward", "25som", "NoTwis", "TUCK"]

## UCF101

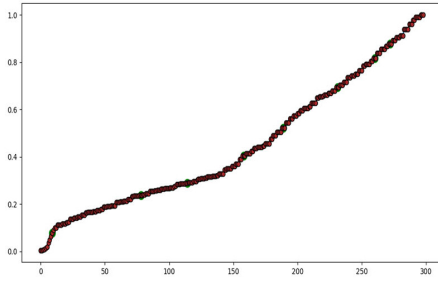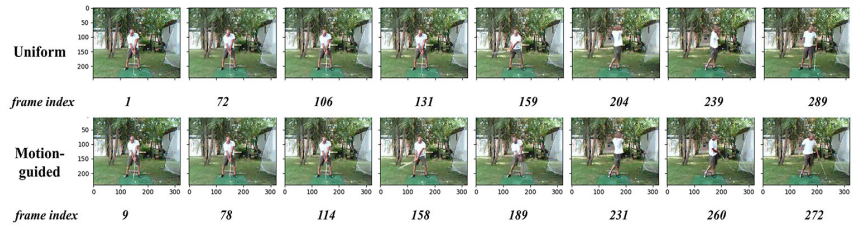

**label: GolfSwing**

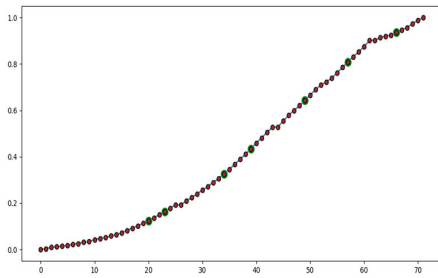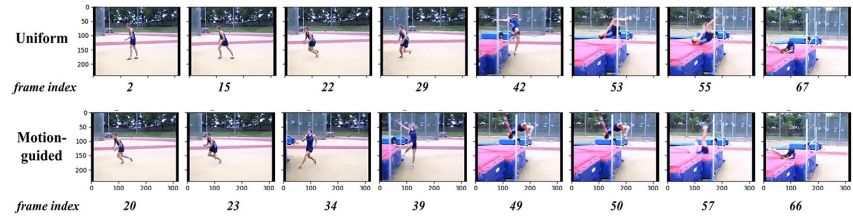

**label: HighJump**

## Jester

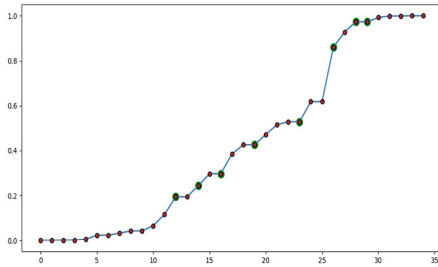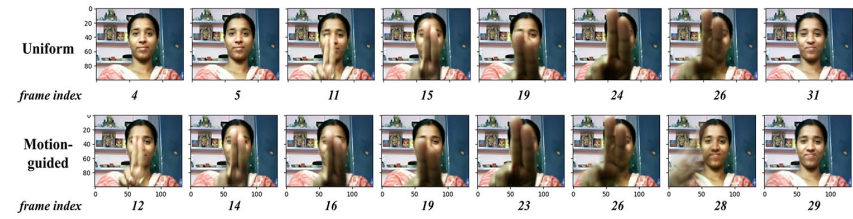

**label: putting two fingers away**

## HMDB

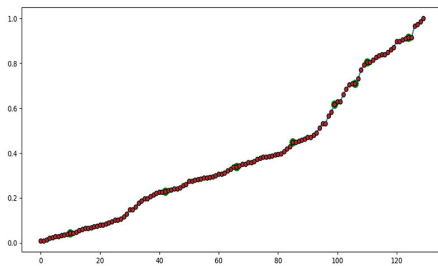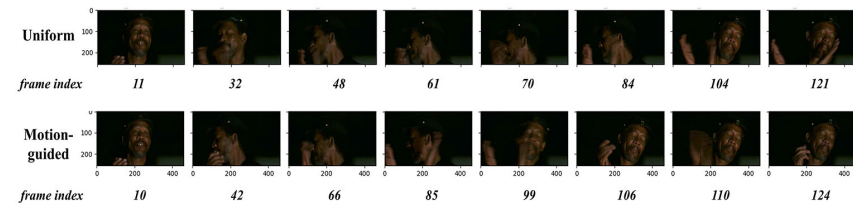

**label: clapping hands**

Figure 1. Examples of comparison between uniform sample and motion-guided sample on five datasets.

- [6] Ji Lin, Chuang Gan, and Song Han. Tsm: Temporal shift module for efficient video understanding. In *Proceedings of the IEEE/CVF International Conference on Computer Vision*, pages 7083–7093, 2019.
- [7] Joanna Materzynska, Guillaume Berger, Ingo Bax, and Roland Memisevic. The jester dataset: A large-scale video dataset of human gestures. In *ICCVW*, pages 2874–2882, 2019.
- [8] Khurram Soomro, Amir Roshan Zamir, and Mubarak Shah. UCF101: A Dataset of 101 Human Actions Classes From Videos in The Wild. *arXiv preprint arXiv:1212.0402*, 2012.
